# Supplementary material for: The Association between Serum Total Bile Acid Level and Long-Term Prognosis in Patients with Coronary Chronic Total Occlusion Undergoing Percutaneous Coronary Intervention
Source: Hindawi journal article supplement (doi:10.1155/2022/1434111), 2022-06-23
Supplement: f1 [file 1434111.f1.zip]

A

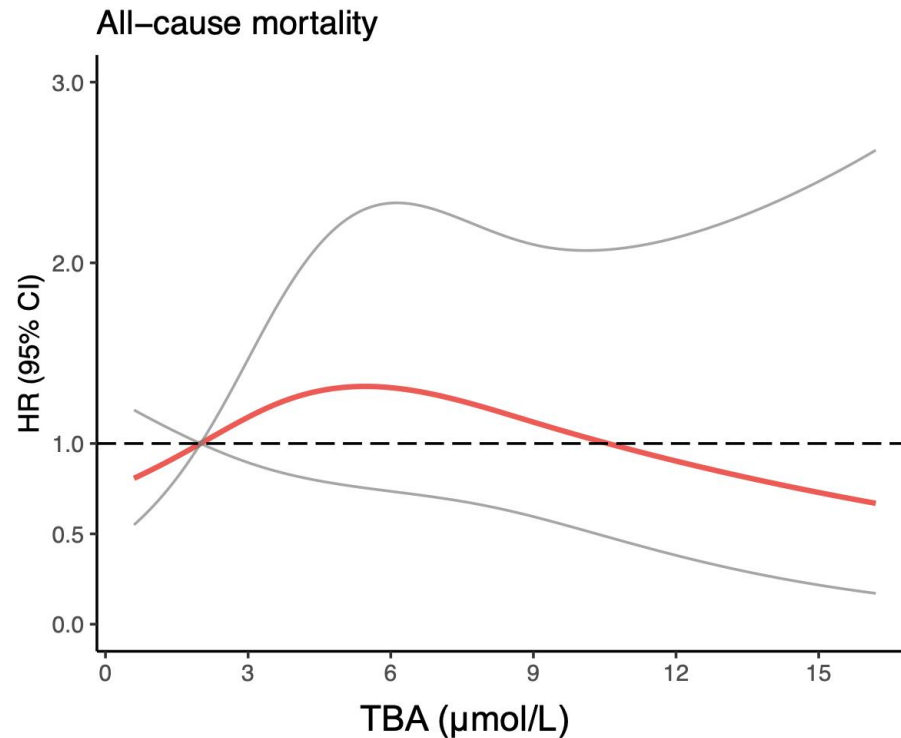

Supplemental Figure 1. Restricted spline curves for the associations between TBA (A) all-cause mortality and (B) cardiovascular death in CTO patients undergoing PCI. Red lines represent the hazard ratio, gray lines represent the 95% confidence intervals. HR (95% CI) was adjusted by age, sex, smoking, hypertension, diabetes mellitus, LVEF, pro-BNP, heart rate, creatinine, revascularization, cholesterol and triglyceride. TBA=total bile acid; CTO=coronary chronic total occlusion; PCI=percutaneous coronary intervention.
