# Supplementary figures and images for: The Association between Serum Total Bile Acid Level and Long-Term Prognosis in Patients with Coronary Chronic Total Occlusion Undergoing Percutaneous Coronary Intervention
Source: Hindawi journal article supplement (doi:10.1155/2022/1434111), 2022-06-23

B

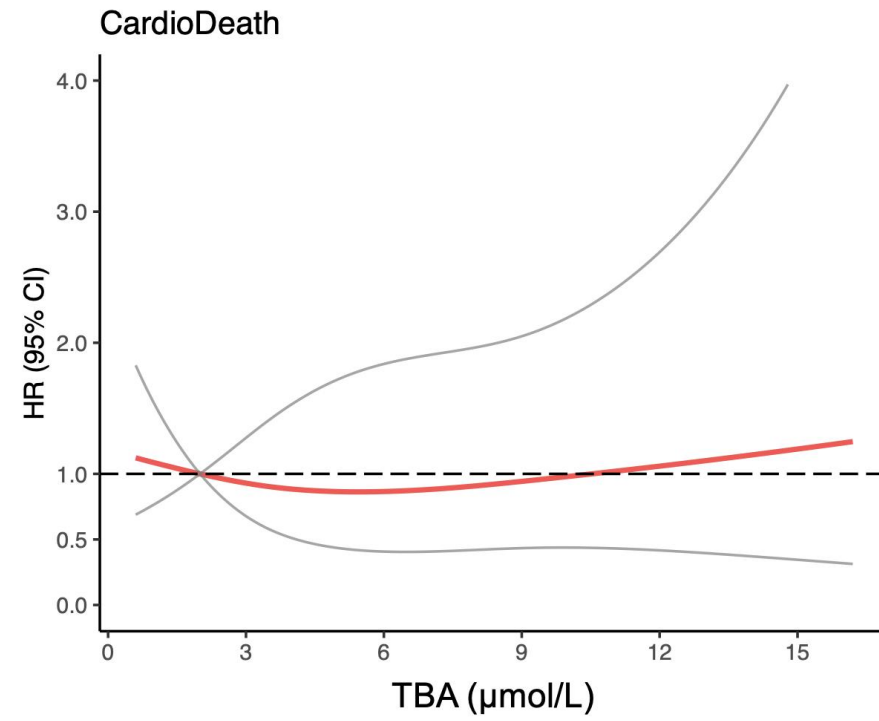

Supplement: f1 [file 1434111.f1.zip]
